# Supplementary material
Source: PubMed Central journal article supplement (PMC4559157)
Supplement: Supp_Fig1.pdf [file Supp_Fig1.pdf]

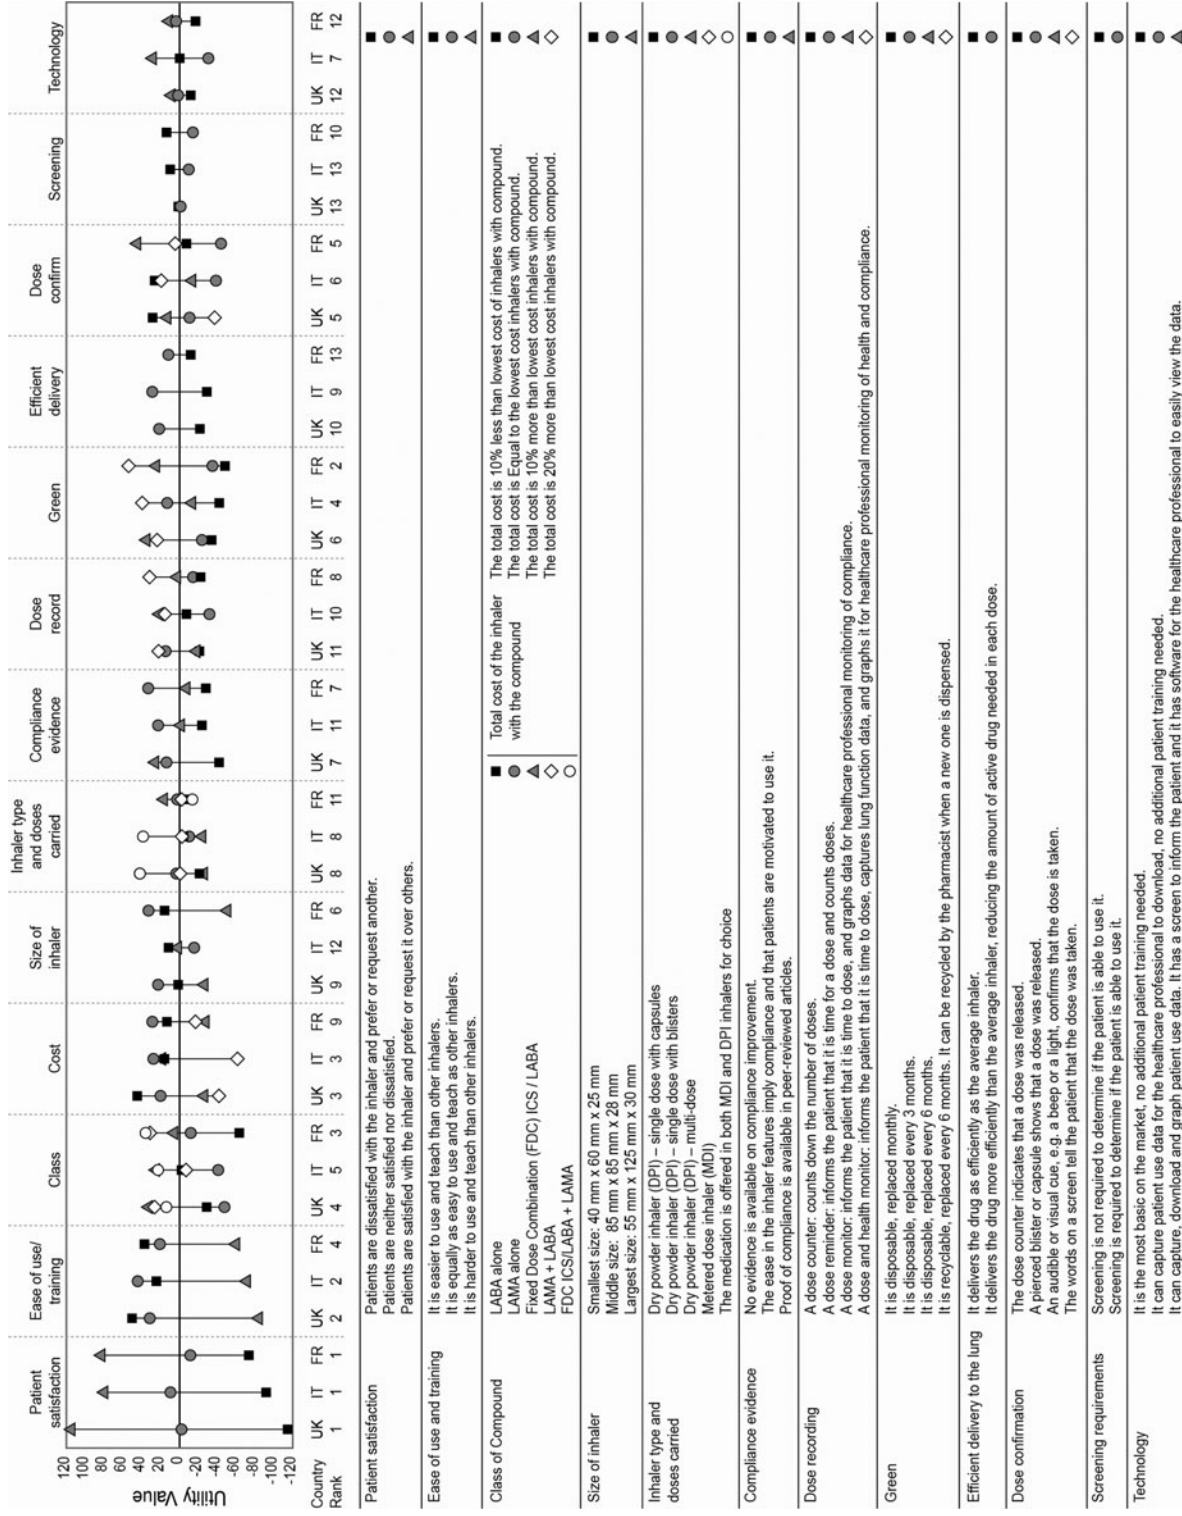

**SUPPLEMENTARY FIG. 1.** Choice utility values (with class and cost attributes) derived for HCPs in UK, Italy, and France. A positive choice utility for a given attribute level indicates a more desirable attribute, whereas a negative utility value of the attribute level indicates a less desirable attribute. For each attribute, the larger the spread from the highest to lowest utility value, the higher that attribute's importance. FR, France; ICS, inhaled corticosteroids; IT, Italy; LABA, long-acting  $\beta_2$  agonists; LAMA, long-acting muscarinic antagonists; UK, United Kingdom.
