# Supplementary material
Source: PubMed Central journal article supplement (PMC4559157)

**SUPPLEMENTARY FIG. 2.** Reason most likely to use electronically captured information from an inhaler. HCPs were asked: For which reason would you be most likely to use electronically captured dosing information from an inhaler?

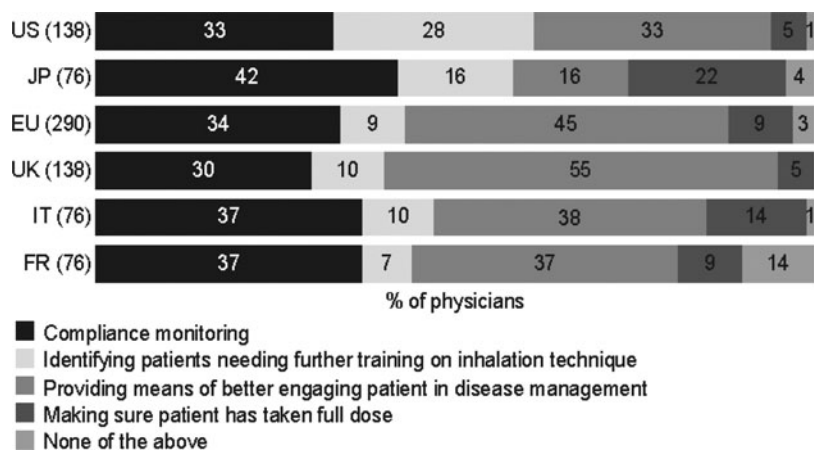

Supplement: Supp_Fig2.pdf [file Supp_Fig2.pdf]
