# Supplementary material
Source: PubMed Central journal article supplement (PMC4559157)
Supplement: Supp_Table1.pdf [file Supp_Table1.pdf]

## Supplementary Data

SUPPLEMENTARY TABLE 1. INHALER ATTRIBUTES EVALUATED BY PATIENTS IN THE CHOICE SURVEY

| <i>Attributes evaluated by patients</i> |                                                                                                                                                                                                                                                                                                                                                                                                                                                                                                       |
|-----------------------------------------|-------------------------------------------------------------------------------------------------------------------------------------------------------------------------------------------------------------------------------------------------------------------------------------------------------------------------------------------------------------------------------------------------------------------------------------------------------------------------------------------------------|
| <i>Doses carried</i>                    | Multi-dose: The inhaler has multiple doses of medication already inside it.<br>Single-dose: You place a dose of medication into the inhaler before you use it.                                                                                                                                                                                                                                                                                                                                        |
| <i>Ease of use</i>                      | It is easier to use than your main inhaler.<br>It is equally as easy to use as your main inhaler.<br>It is harder to use than your main inhaler.                                                                                                                                                                                                                                                                                                                                                      |
| <i>Dose confirmation</i>                | The dose counter indicates that a dose was released.<br>A pierced blister or capsule shows that a dose was released.<br>An audible or visual cue, e.g. a beep or a light, confirms that the dose is taken.<br>The words on a screen tell you that the dose was taken.                                                                                                                                                                                                                                 |
| <i>Dose recording</i>                   | There is no dose counter, reminder or monitor.<br>A dose counter: counts down the number of doses.<br>A dose reminder: informs you that it is time for a dose and counts doses.<br>A dose monitor: informs you that it is time to dose, and provides information for your doctor or nurse to monitor your dosing.<br>A dose and health monitor: informs you that it is time to dose, and captures your lung function test information for your doctor or nurse to monitor your health.                |
| <i>Size of inhaler</i>                  | Smallest size: 40mm × 60 mm × 25 mm<br>Middle size: 85mm × 85 mm × 28 mm<br>Largest size: 55 mm × 125 mm × 30 mm                                                                                                                                                                                                                                                                                                                                                                                      |
| <i>Technology</i>                       | It is the most basic on the market, no additional training needed.<br>It captures information about your use of the inhaler for your doctor or nurse, there are no additional steps for you to take to make this happen.<br>It can capture and download data to a computer with software to easily view the data. It has a screen to inform you about your health and dosing (e.g., refill reminders, lung function, and tell you if your data warrants urgent medical attention in some situations). |
| <i>Disposable or recyclable</i>         | It is disposable, replaced monthly.<br>It is disposable, replaced every 3 months.<br>It is disposable, replaced every 6 months.<br>It is recyclable, replaced every 6 months. It can be recycled by the pharmacist when a new one is dispensed.                                                                                                                                                                                                                                                       |
| <i>'Ready to Inhale' Cue</i>            | No, there are no additional cues, such as a beep or a light to confirm that the does is ready to inhale.<br>Yes, there is an audible or visual cue, such as a beep or a light, confirms that the dose is ready to inhale.                                                                                                                                                                                                                                                                             |
| <i>Number of doses each day</i>         | One: You need to use this inhaler once a day<br>Two: You need to use this inhaler twice a day                                                                                                                                                                                                                                                                                                                                                                                                         |
