# Supplementary material
Source: PubMed Central journal article supplement (PMC4559157)
Supplement: Supp_Table2.pdf [file Supp_Table2.pdf]

SUPPLEMENTARY TABLE 2. INHALER ATTRIBUTES EVALUATED BY HCPs IN THE CHOICE SURVEY

*Attributes evaluated by HCPs*

|                                                    |                                                                                                                                                                                                                                                                                                                                                                                                                                                                    |
|----------------------------------------------------|--------------------------------------------------------------------------------------------------------------------------------------------------------------------------------------------------------------------------------------------------------------------------------------------------------------------------------------------------------------------------------------------------------------------------------------------------------------------|
| <i>Inhaler type and doses carried</i>              | DPI– single dose with capsules<br>DPI – single dose with blisters<br>DPI – multi-dose<br>MDI<br>The medication is offered in both MDI and DPI inhalers for choice                                                                                                                                                                                                                                                                                                  |
| <i>Screening requirements</i>                      | Screening is not required to determine if the patient is able to use it.<br>Screening is required to determine if the patient is able to use it.                                                                                                                                                                                                                                                                                                                   |
| <i>Patient feedback</i>                            | Patients are dissatisfied with the inhaler and prefer or request another.<br>Patients are neither satisfied nor dissatisfied.<br>Patients are satisfied with the inhaler and prefer or request it over others.                                                                                                                                                                                                                                                     |
| <i>Ease of use and training</i>                    | It is easier to use and teach than other inhalers.<br>It is equally as easy to use and teach as other inhalers.<br>It is harder to use and teach than other inhalers.                                                                                                                                                                                                                                                                                              |
| <i>Dose confirmation</i>                           | The dose counter indicates that a dose was released.<br>A pierced blister or capsule shows that a dose was released.<br>An audible or visual cue, e.g. a beep or a light, confirms that the dose is taken.<br>The words on a screen tell the patient that the dose was taken.                                                                                                                                                                                      |
| <i>Dose recording</i>                              | A dose counter: counts down the number of doses.<br>A dose reminder: informs the patient that it is time for a dose and counts doses.<br>A dose monitor: informs the patient that it is time to dose, and graphs data for healthcare professional monitoring of compliance.<br>A dose and health monitor: informs the patient that it is time to dose, captures lung function data, and graphs it for healthcare professional monitoring of health and compliance. |
| <i>Size of inhaler</i>                             | Smallest size: 40mm × 60 mm × 25 mm<br>Middle size: 85mm × 85 mm × 28 mm<br>Largest size: 55 mm × 125 mm × 30 mm                                                                                                                                                                                                                                                                                                                                                   |
| <i>Compliance evidence</i>                         | No evidence is available on compliance improvement.<br>The ease in the inhaler features implies compliance and that patients are motivated to use it.<br>Proof of compliance is available in peer-reviewed articles.                                                                                                                                                                                                                                               |
| <i>Efficient delivery to the lung</i>              | It delivers the drug as efficiently as the average inhaler.<br>It delivers the drug more efficiently than the average inhaler, reducing the amount of active drug needed in each dose.                                                                                                                                                                                                                                                                             |
| <i>Technology</i>                                  | It is the most basic on the market, no additional patient training needed.<br>It can capture patient use data for the healthcare professional to download, no additional patient training needed.<br>It can capture, download and graph patient use data. It has a screen to inform the patient and it has software for the healthcare professional to easily view the data.                                                                                       |
| <i>Green</i>                                       | It is disposable, replaced monthly.<br>It is disposable, replaced every 3 months.<br>It is disposable, replaced every 6 months.<br>It is recyclable, replaced every 6 months. It can be recycled by the pharmacist when a new one is dispensed.                                                                                                                                                                                                                    |
| <i>Class of compound</i>                           | LABA alone<br>LAMA alone<br>FDC (ICS / LABA)<br>LAMA + LABA<br>FDC (ICS/LABA) + LAMA                                                                                                                                                                                                                                                                                                                                                                               |
| <i>Total cost of the inhaler with the compound</i> | The total cost is 10% less than lowest cost of inhalers with compound.<br>The total cost is Equal to the lowest cost inhalers with compound.<br>The total cost is 10% more than lowest cost inhalers with compound.<br>The total cost is 20% more than lowest cost inhalers with compound.                                                                                                                                                                         |

DPI, dry powder inhaler; FDC, fixed dose combination; HCPs, Health care practitioners; ICS, inhaled corticosteroids; LABA, long-acting  $\beta$  agonist; LAMA, long-acting muscarinic antagonist; MDI, metered dose inhaler.
